# Supplementary material
Source: Springer Nature journal article supplement (https://www.springermedizin.de/resource/supplementary/12936_2010_1389_MOESM1_ESM.pdf/9549682)

Cases Number of Malaria

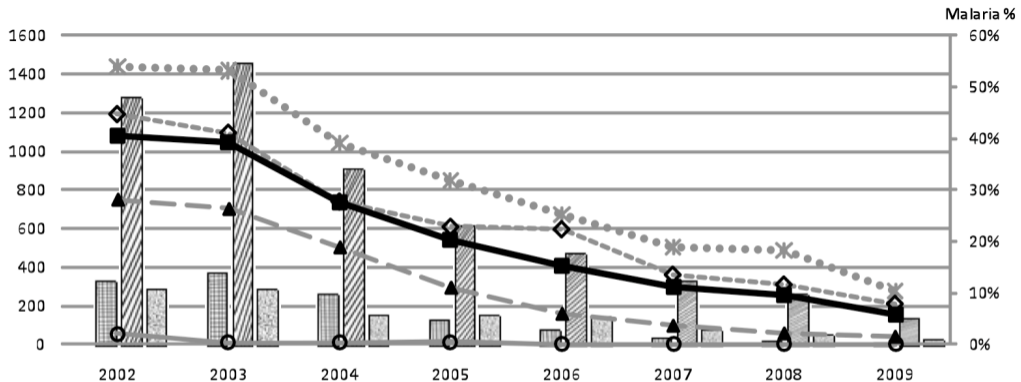

○ Neonates%    ▲ Infants%    ● \* 1-4 years %    -◇- 5-13 years%    ■ Total

Supplement: MOESM1 [file 9549682]
